# Supplementary material for: Role of Thromboelastography as an Early Predictor of Disseminated Intravascular Coagulation in Patients with Septic Shock
Source: MDPI journal article supplement (doi:10.3390/jcm9123883), 2020-11-29
Supplement: s1 [file s1]

**Supplementary Table S1. Scoring system for overt DIC proposed by ISTH**

| <b>Score</b>                                |   |
|---------------------------------------------|---|
| <b>Platelet count (x 10<sup>3</sup>/uL)</b> |   |
| < 50                                        | 2 |
| ≥ 50 and < 100                              | 1 |
| ≥ 100                                       | 0 |
| <b>Fibrin-related markers</b>               |   |
| Strong increase                             | 3 |
| Moderate increased                          | 2 |
| No increase                                 | 0 |
| <b>Prothrombin time (s)</b>                 |   |
| ≥ 6                                         | 2 |
| 3-6                                         | 1 |
| < 3                                         | 0 |
| <b>Fibrinogen level (g/mL)</b>              |   |
| < 100                                       | 1 |
| ≥ 100                                       | 0 |
| <b>Calculate score</b>                      |   |
| If ≥ 5, compatible with over DIC            |   |
| If < 5, suggestive for non-overt DIC        |   |

DIC; disseminated intravascular coagulation; ISTH, international society of thrombosis and hemostasis
